# Supplementary material for: Double role of hydroxy group for water dispersibility and luminescence of REF3 (RE = Yb, Er, Tm) based mesocrystals
Source: Royal Society of Chemistry journal article supplement (doi:10.1039/c5nj01355k), 2015-01-01
Supplement: c5nj01355k1.pdf [file c5nj01355k1.pdf]

## Electronic Supporting Information

### Double role of the hydroxy group for water dispersibility and luminescence of $REF_3$ (RE=Yb,Er,Tm) based

Xianghong He,<sup>a,b</sup> and Bing Yan<sup>\*a</sup>

<sup>a</sup> Department of Chemistry, Tongji University, Shanghai, 200092, China

<sup>b</sup> School of Chemistry and Environmental Engineering, Jiangsu University of Technology,  
Changzhou, Jiangsu 213001, China

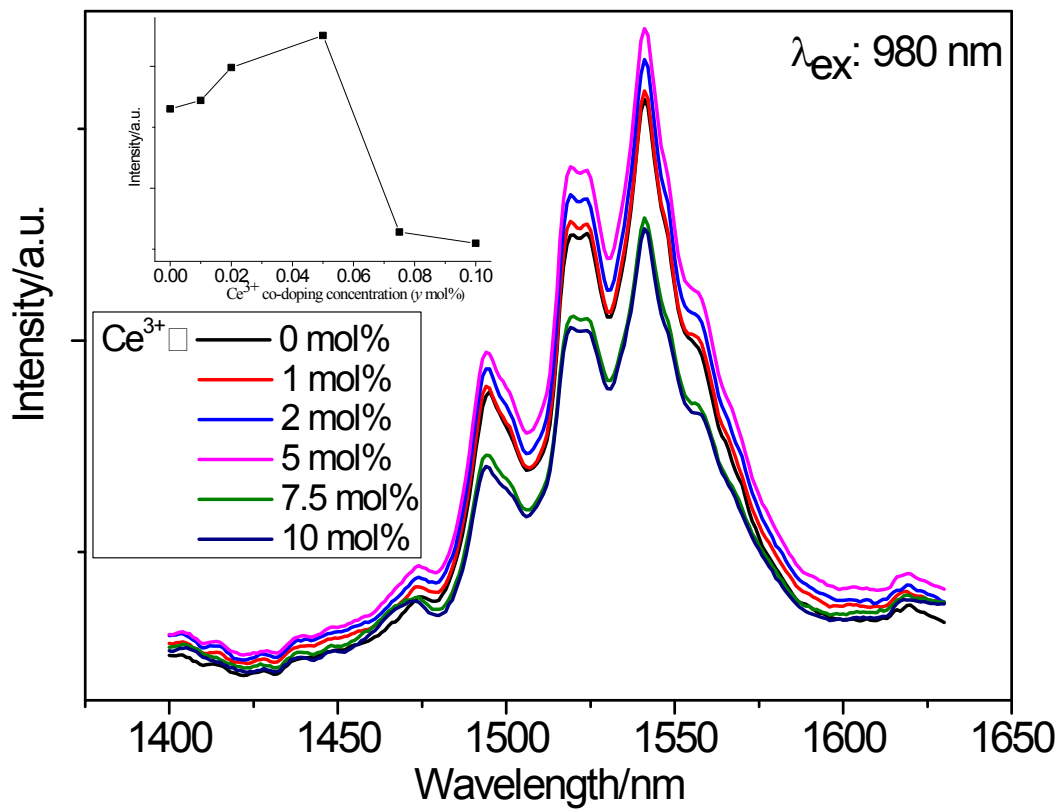

**Fig. S1** NIR emission spectra of  $\text{YbF}_3:\text{Er}^{3+},\text{Ce}^{3+}(2/\gamma \text{ mol}\%)$  mesocrystals with different  $\text{Ce}^{3+}$  doping contents (the inset shows the dependence of NIR emission intensity on  $\text{Ce}^{3+}$  doping level).

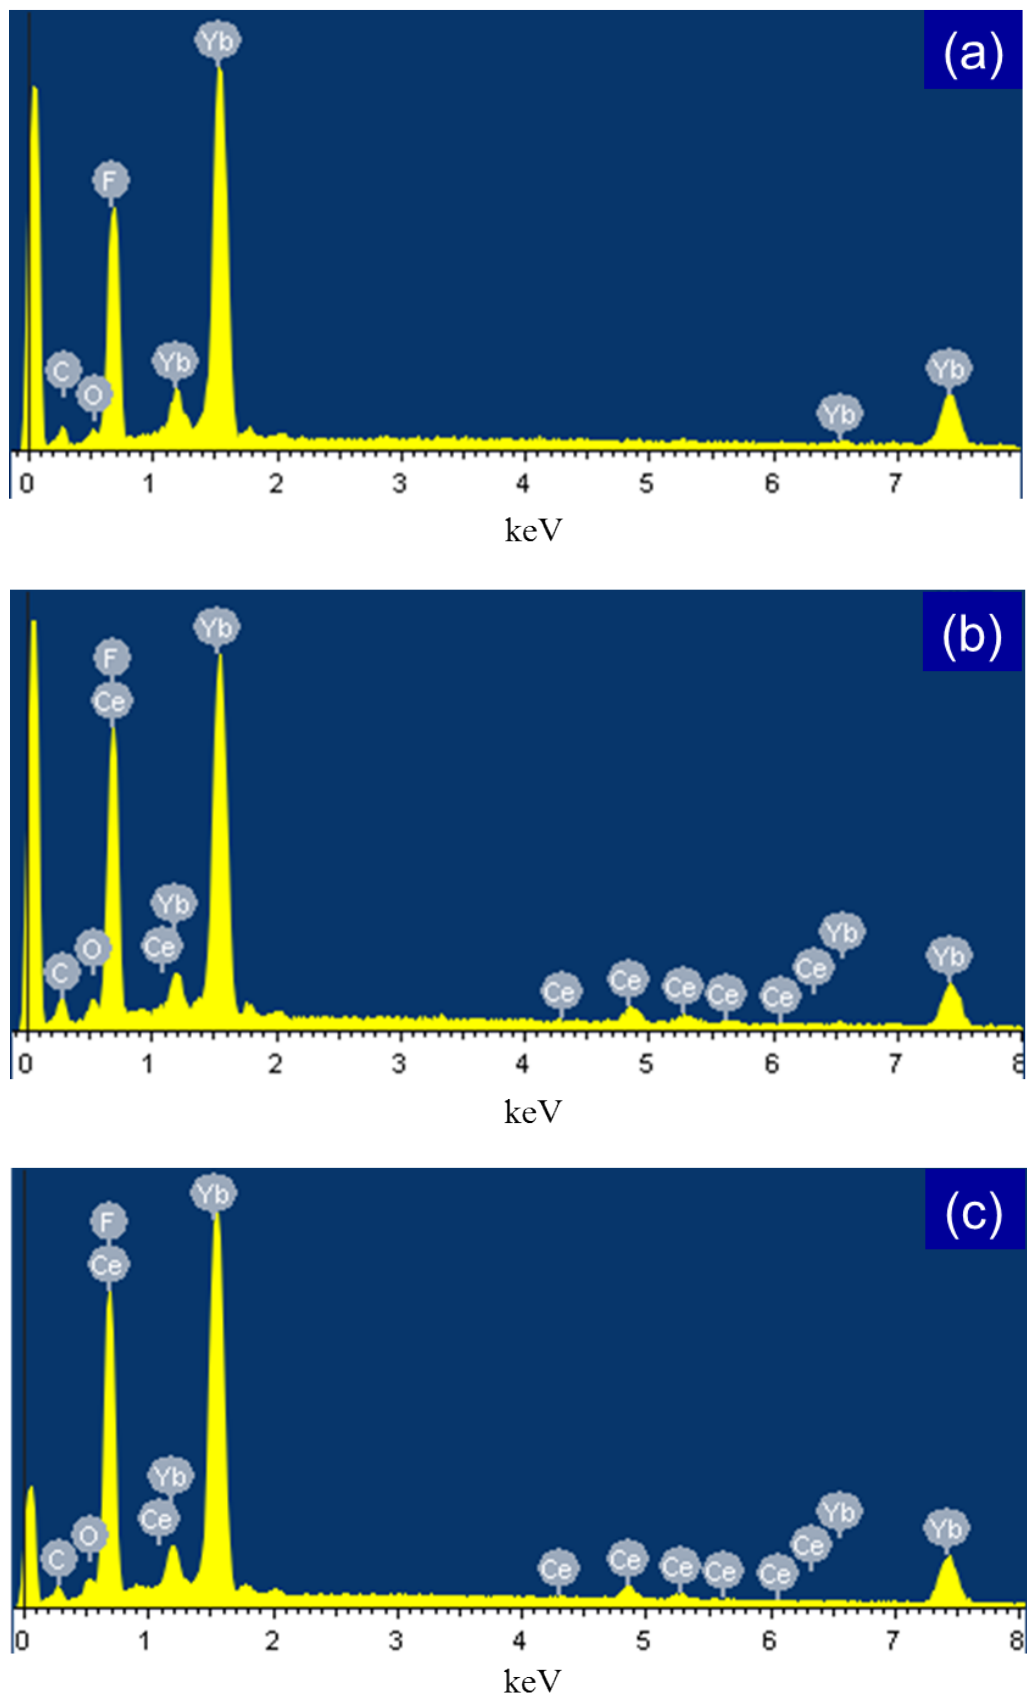

**Fig. S2** EDS patterns of as-obtained  $\text{YbF}_3:\text{Er}^{3+}, \text{Ce}^{3+}$  ( $2/y$  mol%) mesocrystals with different  $\text{Ce}^{3+}$  doping contents [ a) $y = 1$ , b) $y = 5$ , c) $y = 10$ ].
